# Supplementary material
Source: HighWire-hosted journal article supplement (https://bmjopenquality.bmj.com/content/6/2/e000106)
Supplement: inline-supplementary-material-1 [file inline-supplementary-material-1.xls]

## Sheet: Figure 3.
Task breakdown sheet STEP 3 /STEP 4
	Name of task:
	Producer:	Collaborator:
	Department:
	Step 3
Number	DETAILS OF NEW PROCESS		IMPROVEMENT POINT
Step 4
Requires approval from manager
Newly required products/supplies
Approval of (1) colleague(s), (2) direct report(s), and (3) other department(s) (presentation on improvement effects, implementation of required training)
Requires approval from associated departments
Planned dates of implementation and confirmation		Planned date of implementation: Planned date of confirmation:
