# Supplementary material
Source: HighWire-hosted journal article supplement (https://bmjopenquality.bmj.com/content/6/2/e000106)
Supplement: inline-supplementary-material-3 [file inline-supplementary-material-3.xls]

## Sheet: Figure 2.
Task breakdown sheet STEPS 1–3
	Name of task:			Objective of improvement:
	Producer:	Collaborator:
	Department:
	Step 1			Step 2						Step 3
Number	TASK DETAILS	REMARKS		WHY-WHAT	WHERE	WHEN	WHO	HOW	IDEAS	ELIMINATE	COMBINE	REARRANGE	SIMPLIFY
